# Supplementary material for: Centriolar satellites expedite mother centriole remodeling to promote ciliogenesis
Source: eLife journal article supplement (doi:10.7554/elife.79299), 2023-02-15

Figure 4 G

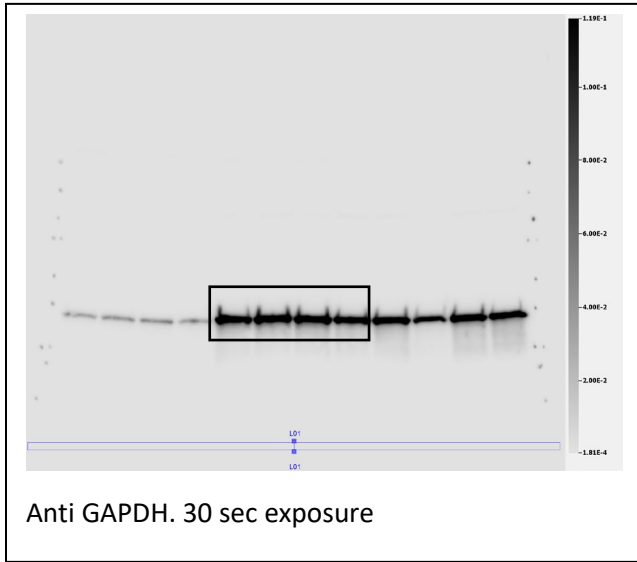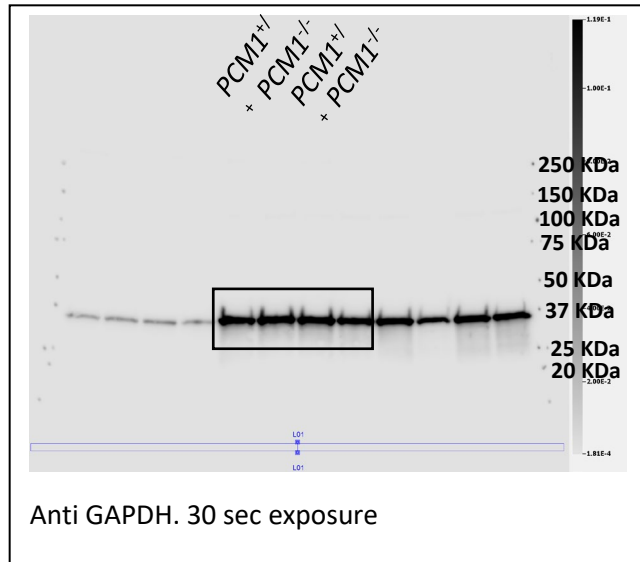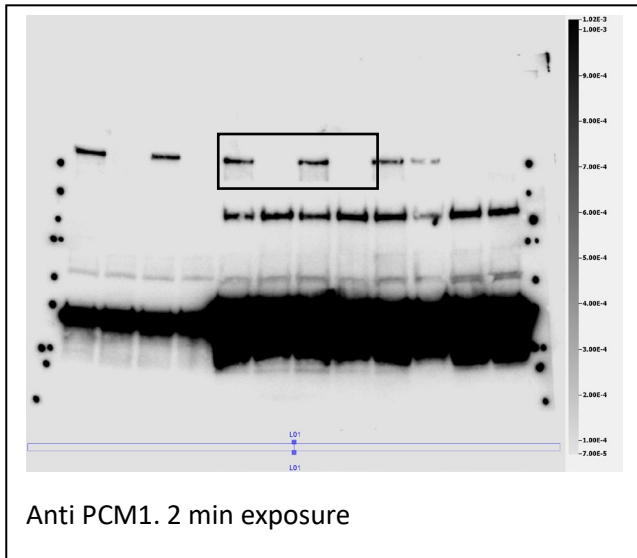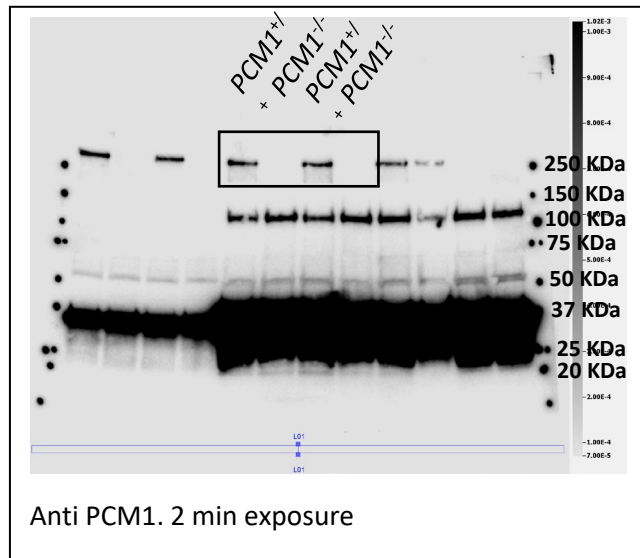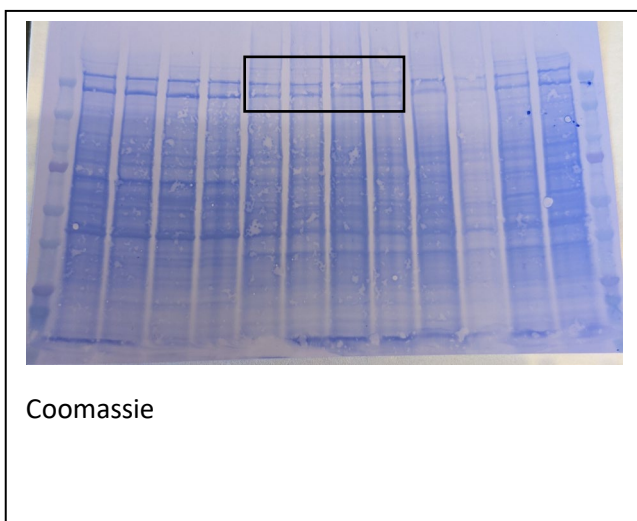

Supplement: fig4-data1 [file elife-79299-fig4-data1-v2.pdf]
