# Supplementary material for: Centriolar satellites expedite mother centriole remodeling to promote ciliogenesis
Source: eLife. 2023 Feb 15;12:e79299. doi: 10.7554/eLife.79299 (PMC9998092; doi:10.7554/eLife.79299)
Supplement: Supplementary file 1. [file elife-79299-supp1.xlsx]

## Sheet: Sheet1
Table 1 CRISPR guides, repair templates and siRNAs
Name	Sequence	Application	Source
Pcm1 Exon2	5' - ATTAAAGGCAACATGGCCAC - 3'	CRISPR guide for generation of Pcm15-14 and Pcm1SNAP mouse	Dharmacon
Pcm1 Exon6	5' - TCAGGCCAGAGATCCTCAGC - 3'	CRISPR guide for generation of Pcm1 796-800 mouse	Dharmacon
SNAP repair	5' - aaaaataattctgaagccaaaaaccgctgcaaggaggatttatgagtttggcagacttcagggagattgacacaacactatgagagacagtaagcactcattgaaatgtgtttagtgcatttgttctgttttatttggaacaaactttattttaaatagcttactataagctcaggctggtctagaacacctgattctcatacttacctcctagtactgcgattataagcatgtgctaccatctccattatataatgtgtatatcatgtagatcaatttatctgtgatacgtgtttgatagtgtattcttttatatttttggttgtgagcctagcctttaacagctgagccatctctccagctcgatagtgtattctttaagataagtgtttga…	Repair template for generation of Pcm1SNAP mouse	IDT
PCM1 Exon 3	5’- GAAAAGAAUAAGAAAAAGUU-3’	CRISPR guide for generation of PCM1-/- RPE cells	Synthego
PCM1 Exon 3	5’- CGACUCCGGAGAAAUAUCA-3’	CRISPR guide for generation of PCM1-/- RPE cells	Synthego
Luciferase GL2 Duplex siRNA	5' - CGUACGCGGAAUACUUCGA -3'	Control siRNA	Dharmacon
CEP290 ID: s37024 Silencer Select siRNA	5' - GAUACUCGGUUUUUACGUA -3'	CEP290 siRNA	Ambion/ThermoFisher
CEP290 ID: s37025 Silencer Select siRNA	5' - CACUUACGGACUUCGUUAA - 3'	CEP290 siRNA	Ambion/ThermoFisher
