# Supplementary material for: Centriolar satellites expedite mother centriole remodeling to promote ciliogenesis
Source: eLife. 2023 Feb 15;12:e79299. doi: 10.7554/eLife.79299 (PMC9998092; doi:10.7554/eLife.79299)
Supplement: Supplementary file 2. [file elife-79299-supp2.xlsx]

## Sheet: Sheet1
Table 2 Genotyping primers.
Mouse Line	Primer name	Primer Sequence	Process	Product size
Pcm15-14	Pcm1 2F	5' CTCTGACCTCTGCACACATG 3'	PCR followed by Sanger sequencing	332bp
	Pcm1 2R	5' ACAATCGATGGGAGAGCCTC 3'
Pcm1796-800	Pcm1 6F	5' AGTATCGCTGTACTTTGCCA 3'	PCR followed by DdeI digestion	266bp
	Pcm1 6R	5' CAGAGTCATCCATCACAGCTAT 3'
Pcm1SNAP	Pcm1 2F	5' CTCTGACCTCTGCACACATG 3'	PCR	332bp
	Pcm1 2R	5' ACAATCGATGGGAGAGCCTC 3'
	SNAP F	5' GGCCTGCACCGTATCATCTT 3'		132bp
	SNAP R	5' AAAGTAGGCGTTGAGCCAGG 3'
