# Supplementary material for: Centriolar satellites expedite mother centriole remodeling to promote ciliogenesis
Source: eLife. 2023 Feb 15;12:e79299. doi: 10.7554/eLife.79299 (PMC9998092; doi:10.7554/eLife.79299)
Supplement: Supplementary file 3. [file elife-79299-supp3.xlsx]

## Sheet: Sheet1
Table 3 Primary antibodies
Antigen	Antibody/Clone Name	Host species	Source	Application
α-tubulin	DM1A	Mouse	Sigma	WB (1:1000)
ACETYLATED ALPHA TUBULIN	6-11B-1 T6793	Mouse	Sigma	IF (1:1000-1:2000)
ANKRD26	GTX128255	Rabbit	GeneTex	IF(1:100 MeOH)
ARL13B	17711-1-AP	Rabbit	ARL13B	IF (1:1000, PFA)
a-tubulin	ab4074	Rabbit	Abcam	WB (1:1000)
CENTRIN	20H5 04-1624	Mouse	Merck	IF (1:300 MeOH w. PE)
CENTRIOLIN	sc-365521	Mouse	Santa Cruz	IF (1:100 MeOH w PE)
CENTROBIN	Ab70448	Mouse	Abcam	IF(1:100 MeOH)
CEP131	25735-1-AP	Rabbit	Proteintech Group	IF (1:75 MeOH w PE)
CEP162	HPA030170	Rabbit	Sigma Prestige	IF(1:100 MeOH)
CEP164	sc-240226	Goat	Santa Cruz	IF(1:100 MeOH)
CEP290	B-7 sc-390462	Mouse	Santa Cruz	IF (1:500 MeOH)
CEP97	22050-1-AP	Rabbit	Proteintech Group	IF(1:100 MeOH)
CP110	12780-1-AP	Rabbit	Proteintech Group	IF/WB (1:1000)
CP110	MABT1354	Mouse	Millipore	IF (1:100 MeOH w. PE)
FBF1	11531-1-AP	Rabbit	Proteintech Group	IF(1:100 MeOH)
FOP	11343-1-AP	Rabbit	Proteintech Group	IF (1:100 PFA or MeOH)
GAMMA TUBULIN	GTU88 T6557	Mouse	Sigma	IF (1:500, MeOH w PE)
GAPDH	6008-1-Ig	Mouse	Proteintech Group	WB (1:100,000)
IFT81	11744-1-AP	Rabbit	Proteintech Group	IF (1:100 PFA)
IFT88	13967-1-AP	Rabbit	Proteintech Group	IF (1:100 PFA)
MIB1	M5948	Rabbit	Sigma	IF (1:1000 MeOH w. PE)
MYOVA	3402S	Rabbit	Cell Signaling Technology	IF(1:100 MeOH)
NINEIN	L79	Rabbit	Michel Bornens	IF(1:200 MeOH)
PCM1	19856-1-AP	Rabbit	Proteintech Group	IF (1:100, MeOH w PE)
PCM1 C	NBP1-87196	Rabbit	Novus Biologicals	WB (1:1000)
PCM1 N	H0005108-B01P	Mouse	Novus Biologicals	WB (1:1000)
PCM1	D-19 sc-50164	Goat	Santa Cruz	(Figure 7 Supplement 1) IF (1:1000 MeOH)
PCNT	ab4448	Rabbit	Abcam	IF (1:1000, MeOH)
POLY GLUTAMYLATED TUBULIN	AG-20B-0020-C100/GT335	Mouse	Adipogen	IF (1:500)
RAB34	27435-1-AP	Rabbit	Proteintech Group	IF (1:500)
RPGRIP1L	29778-1-AP	Rabbit	Proteintech Group	IF (1:100 PFA w 1% SDS)
TALPID3	24421-1-AP	Rabbit	Proteintech Group	IF(1:100 MeOH)
TTBK2	HPA018113	Rabbit	Sigma Aldrich	IF(I:100
