# Supplementary material for: Centriolar satellites expedite mother centriole remodeling to promote ciliogenesis
Source: eLife. 2023 Feb 15;12:e79299. doi: 10.7554/eLife.79299 (PMC9998092; doi:10.7554/eLife.79299)
Supplement: Supplementary file 4. [file elife-79299-supp4.xlsx]

## Sheet: Sheet1
Table 4 Secondary antibodies
Antigen	Host Species	Dilution	Source	Application
ECL a-Mouse IgG, HRP-conjugated	Sheep	1:7500	GE Healthcare UK Ltd	WB
ECL a-Rabbit IgG, HRP-conjugated	Sheep	1:7500	GE Healthcare UK Ltd	WB
HRP-conjugated a-Rabbit IgG H + L	Goat	1:5000	BioRad	WB
HRP-conjugated a-Mouse IgG H + L	Goat	1:5000	BioRad	WB
Alexa 488-conjugated-a-Mouse	Donkey	1:500	Invitrogen Molecular Probes	IF
Alexa 594-conjugated-a-Rabbit	Donkey	1:500	Invitrogen Molecular Probes	IF
Alexa 488-conjugated-a-Rabbit	Donkey	1:500	Invitrogen Molecular Probes	IF
Alexa 594-conjugated-a-Mouse	Donkey	1:500	Invitrogen Molecular Probes	IF
Alexa 647-conjugated-a-Rabbit	Donkey	1:500	Invitrogen Molecular Probes	IF
Alexa 647-conjugated-a-Mouse	Donkey	1:500	Invitrogen Molecular Probes	IF
Alexa 647-conjugated-a-Goat	Donkey	1:500	Invitrogen Molecular Probes	IF
